# Supplementary material for: In situ amination and side group effect of multifunctional heterocyclic thione ligand toward discrete and polymeric cluster constructions
Source: Royal Society of Chemistry journal article supplement (doi:10.1039/c3dt50165e), 2013-01-01
Supplement: c3dt50165e.pdf [file c3dt50165e.pdf]

## Supporting Information

# In situ amination and side group effect of multifunctional heterocyclic thione ligand toward discrete and polymeric cluster constructions

Sheng Hu, \* Fang-Yong Yu, Peng Zhang and Dian-Rong Lin

*School of Chemical Engineering and Light Industry, Guangdong University of Technology,*

*Guangzhou, 510006, China. E-mail: husheng@gdut.edu.cn*

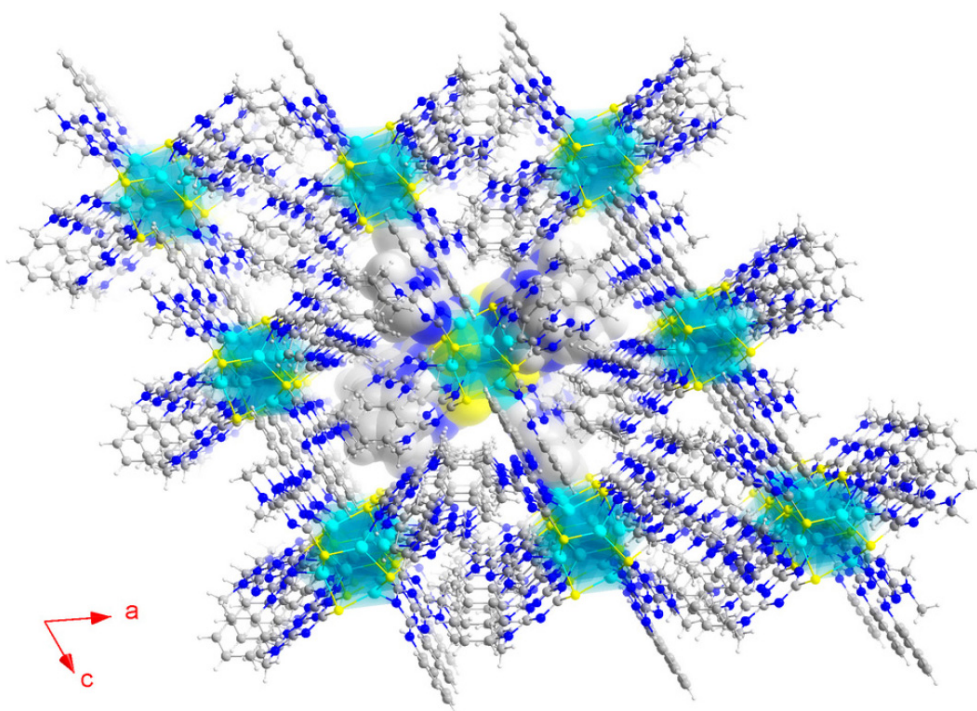

**Figure S1.** The crystal packing of the adjacent hexanuclear copper molecules in compound **1**.

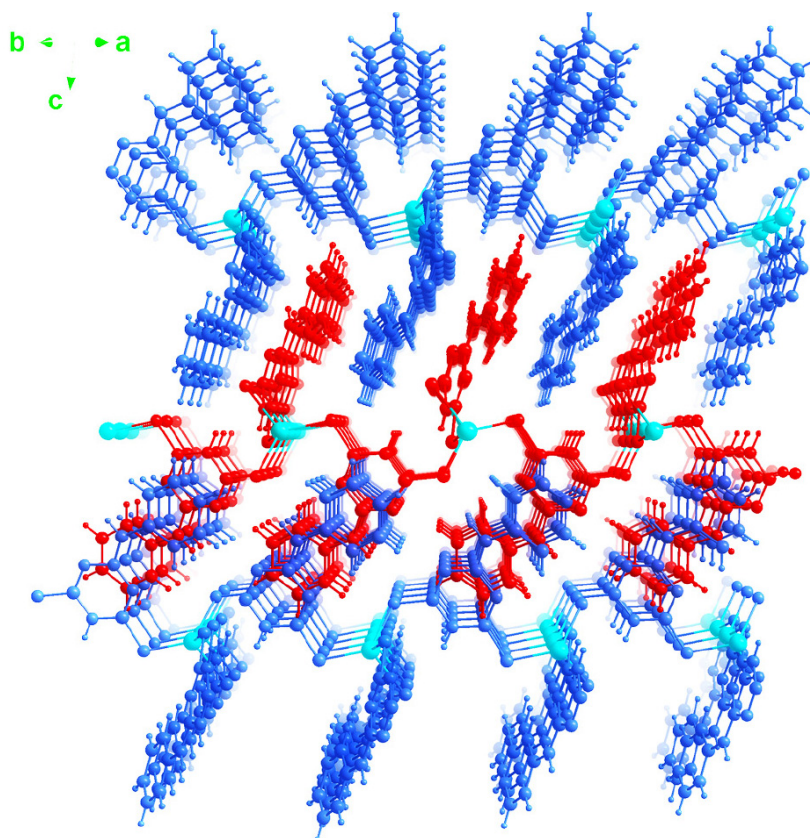

**Figure S2.** The crystal packing of the adjacent (4,4) layers in compound **2**.

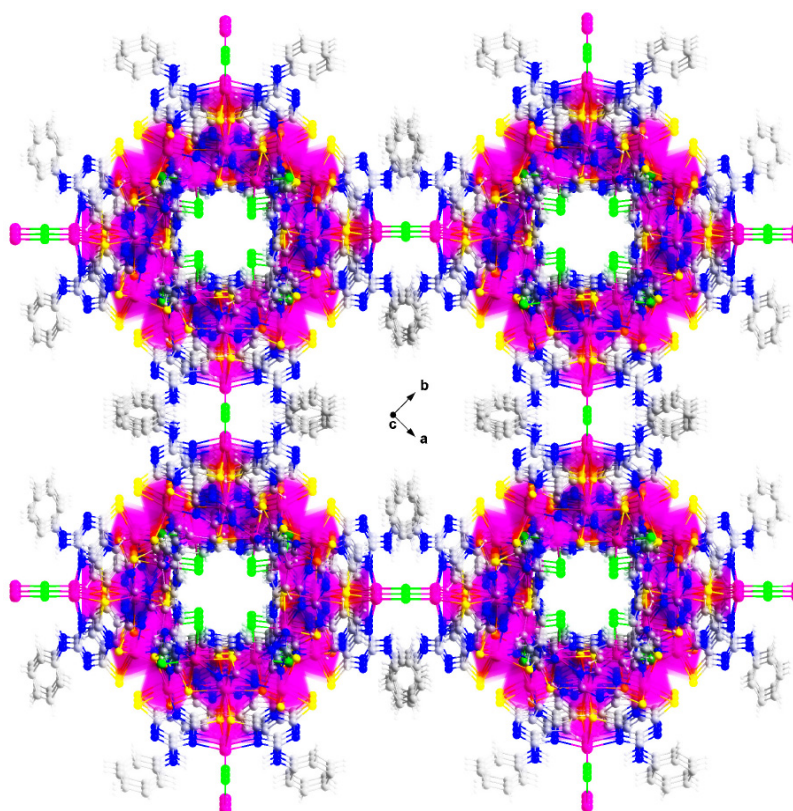

**Figure S3.** The channel of **3** along the *c* axis features cross-shaped window.

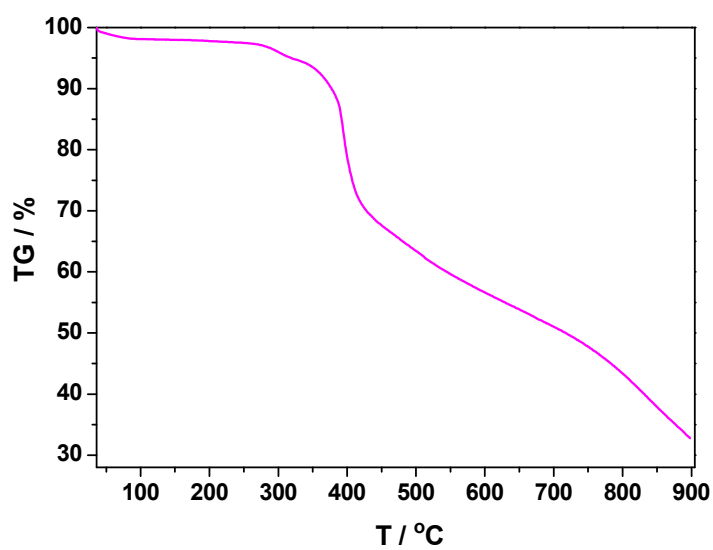

**Figure S4.** TGA curve for an as-synthesized sample of **3** under a dinitrogen atmosphere.

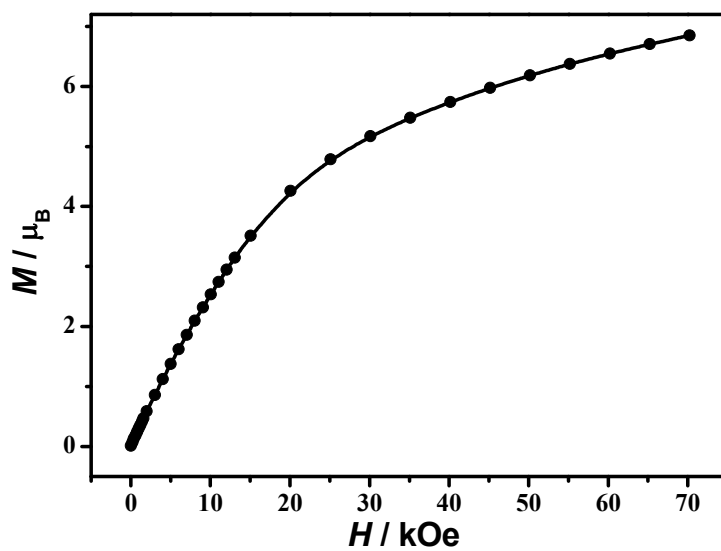

**Figure S5.** Plots of  $M$  vs  $H$  for **3** at 1.8 K.

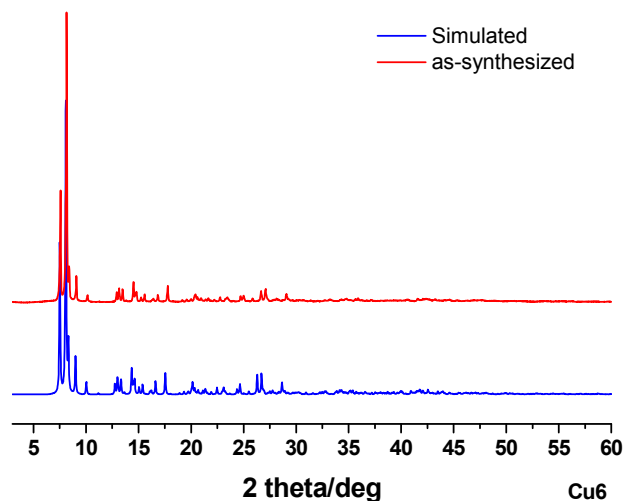

**Figure S6.** Simulated and experimental XRPD data of compound 1.

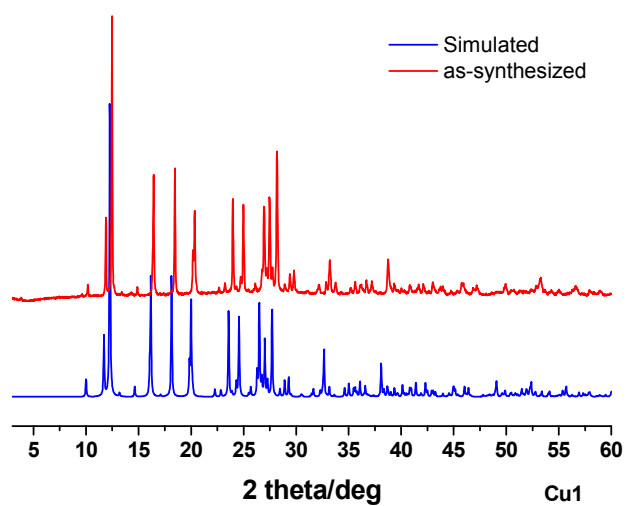

**Figure S7.** Simulated and experimental XRPD data of compound 2.

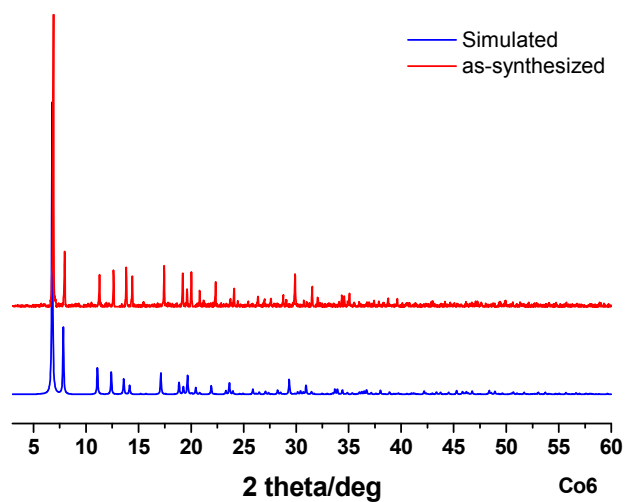

**Figure S8.** Simulated and experimental XRPD data of compound 3.

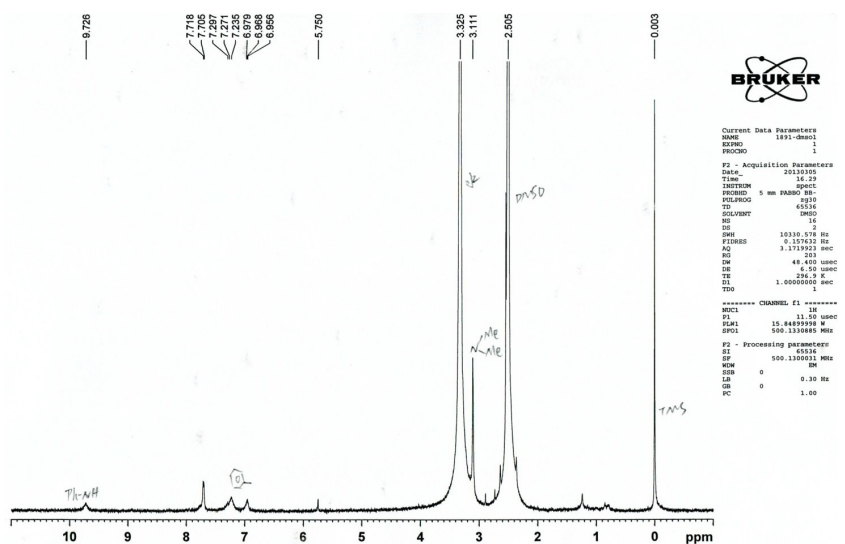

Figure S9.  $^1\text{H}$  NMR spectra of the complex 1.

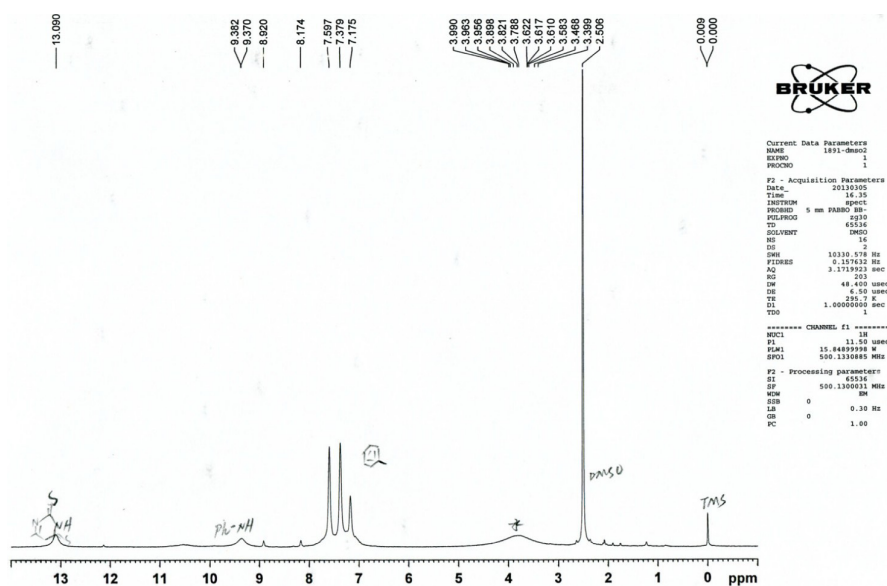

Figure S10.  $^1\text{H}$  NMR spectra of the complex 2.

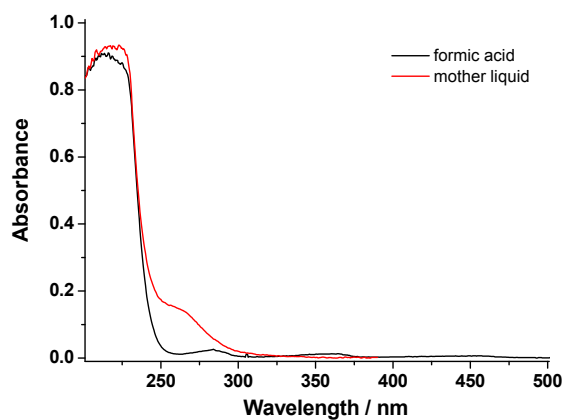

Figure S11. UV-Vis spectra of pure formic acid and the mother liquid collected after solvothermal synthesis of 1.
